# Supplementary material
Source: PubMed Central journal article supplement (PMC8895316)

## Supplemental Online Content

Id Said B, Ailles L, Karamboulas C, et al. Development and validation of an oral cavity cancer outcomes prediction score incorporating patient-derived xenograft engraftment. *JAMA Otolaryngol Head Neck Surg*. Published online March 3, 2022. doi:10.1001/jamaoto.2022.0003

**eTable.** Results of Univariable analysis for locoregional failure and distant metastasis

**eFigure 1.** Venn diagram of patterns of disease failure (N= 121)

**eFigure 2.** Incidence of locoregional failure (2a), distant metastases (2b) and overall survival (2c) according to high- (n=145) vs low-risk groups (n=143) with 8th edition AJCC staging using Tumor Thickness (TT) as a surrogate for Depth of invasion (DOI)

**eFigure 3.** Locoregional failure in low-risk clinical group (3a) and distant metastasis in high-risk clinical group (3b) according to engraftment

**eFigure 4.** Kaplan-Meier curve of overall survival in OSCC high- vs low-risk groups (n=177)

**eFigure 5.** Kaplan-Meier curve of overall survival in high- (5a) and low-risk (5b) clinical groups according to engraftment

**eFigure 6.** Kaplan-Meier curve of overall survival in rapid (n=41) vs slow/non-engrafters (n=247)

**eFigure 7.** Locoregional failure (7a), distant metastasis (7b) and overall survival (7c) in high- vs low- risk groups (PORT cohort)

**eFigure 8.** Kaplan-Meier curve of LRF in engrafters and non-engrafting patients who did not receive PORT (T1-2 N0-1 with negative margins and no ENE)

This supplemental material has been provided by the authors to give readers additional information about their work.

**eTable.** Results of Univariable analysis for locoregional failure and distant metastasis

| <b>Covariate</b>         | <b>HR(95%CI)</b> | <b>Global p-value</b> |
|--------------------------|------------------|-----------------------|
| Female                   | Reference        |                       |
| Male                     | 0.91 (0.64,1.32) |                       |
| <b>Age Dx</b>            | 0.99 (0.98,1.01) | 0.43                  |
| <b>PORT</b>              |                  | <b>&lt;0.001</b>      |
| No                       | Reference        |                       |
| Yes                      | 3.1 (2,4.78)     |                       |
| <b>Subsite</b>           |                  |                       |
| Other                    | Reference        | 0.75                  |
| Tongue                   | 2.63 (1.43,5.15) |                       |
| <b>pT 7th</b>            |                  | <b>&lt;0.001</b>      |
| T1-2                     | Reference        |                       |
| T3-4                     | 2.25 (1.58,3.22) |                       |
| <b>pN 7th</b>            |                  | <b>&lt;0.001</b>      |
| N0-1                     | Reference        |                       |
| N2-3                     | 2.38 (1.67,3.41) |                       |
| <b>pStage 7th</b>        |                  | <b>&lt;0.001</b>      |
| I                        | Reference        |                       |
| II                       | 1.64 (0.69,3.9)  |                       |
| IV                       | 4.07 (1.76,9.41) |                       |
| <b>Margin</b>            |                  | <b>0.019</b>          |
| Clear and/or close       | Reference        |                       |
| Positive                 | 1.68 (1.09,2.6)  |                       |
| <b>Bone invasion</b>     |                  | 0.084                 |
| No                       | Reference        |                       |
| Yes                      | 1.54 (0.94,2.51) |                       |
| <b>LVI</b>               |                  | 0.37                  |
| No                       | Reference        |                       |
| Yes                      | 1.54 (0.59,4.03) |                       |
| <b>PNI</b>               |                  | <b>0.021</b>          |
| No                       | Reference        |                       |
| Yes                      | 1.54 (1.07,2.23) |                       |
| <b>Grade</b>             |                  | <b>0.0074</b>         |
| 1-2                      | Reference        |                       |
| 3                        | 1.69 (1.15,2.47) |                       |
| <b>ENE</b>               |                  | <b>&lt;0.001</b>      |
| No                       | Reference        |                       |
| Yes                      | 3.06 (2.07,4.52) |                       |
| <b>Total LN positive</b> | 1.13 (1.08,1.18) | <b>&lt;0.001</b>      |
| <b>Level 4 5 LN</b>      |                  | <b>&lt;0.001</b>      |
| No                       | Reference        |                       |
| Yes                      | 2.67 (1.62,4.39) |                       |
| <b>Max tumor size</b>    | 1.33 (1.18,1.49) | <b>&lt;0.001</b>      |
| <b>Engraftment</b>       |                  | <b>&lt;0.001</b>      |
| Non-Engrafter            | Reference        |                       |
| Engrafter                | 2.35 (1.53,3.6)  |                       |

**eFigure 1.** Venn diagram of patterns of disease failure (N= 121)

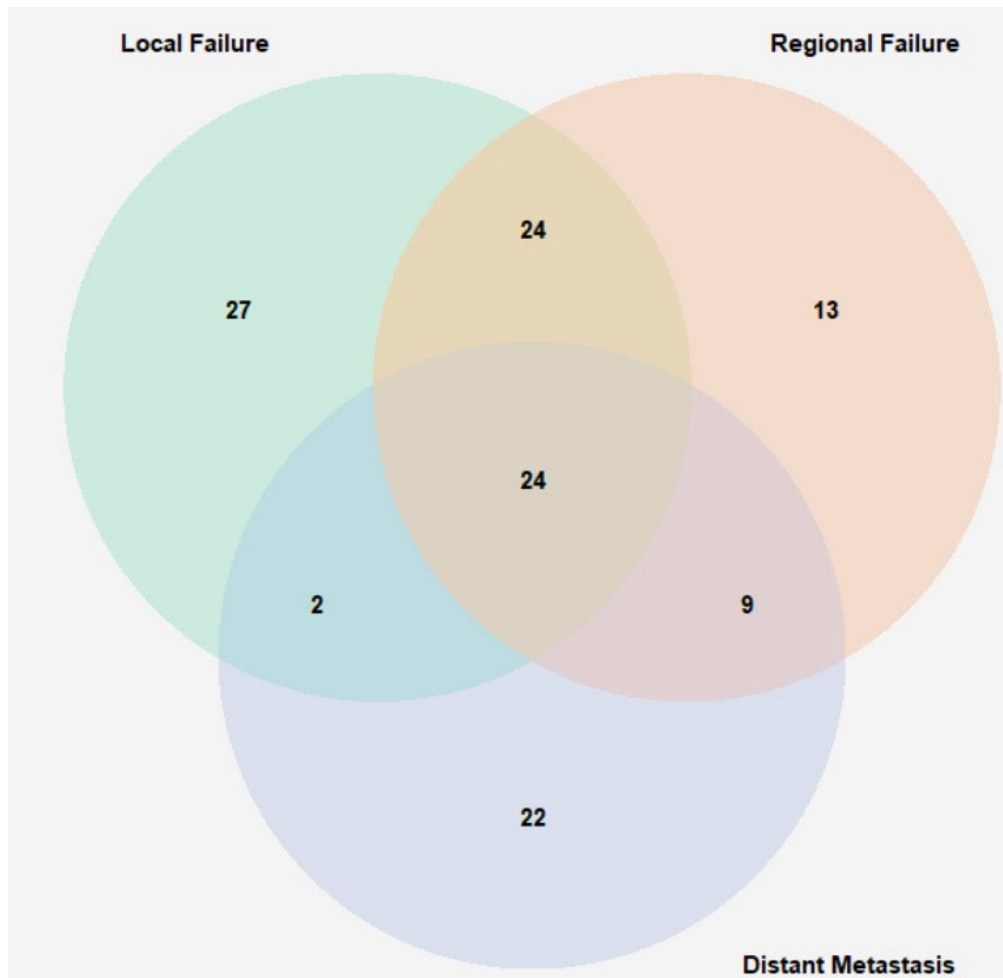

**eFigure 2.** Incidence of locoregional failure (2a), distant metastases (2b) and overall survival (2c) according to high- (n=145) vs low-risk groups (n=143) with 8<sup>th</sup> edition AJCC staging using Tumor Thickness (TT) as a surrogate for Depth of invasion (DOI)

**2a) Locoregional Failure**

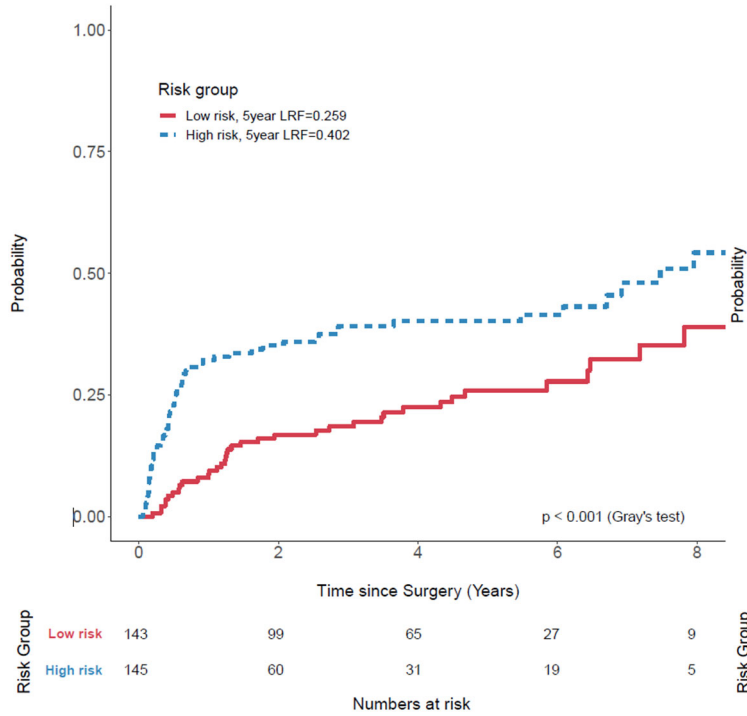

**2b) Distant Metastases**

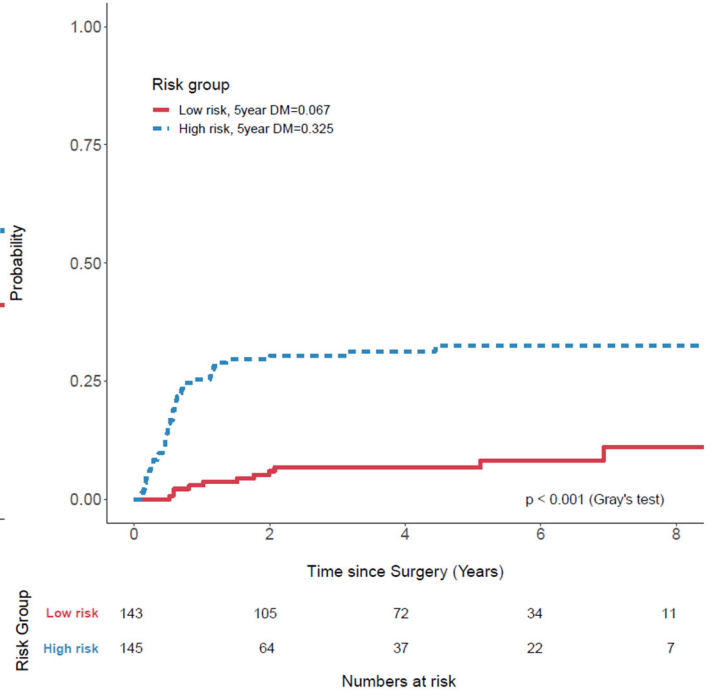

**2c) Overall Survival**

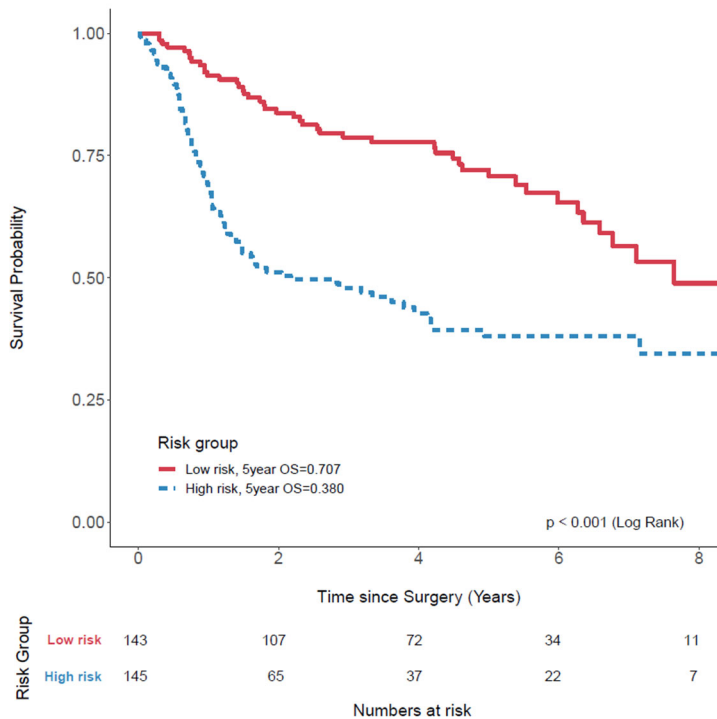

**eFigure 3.** Locoregional failure in low-risk clinical group (3a) and distant metastasis in high-risk clinical group (3b) according to engraftment

**3a) Locoregional Failure in Clinical Low Risk Group**

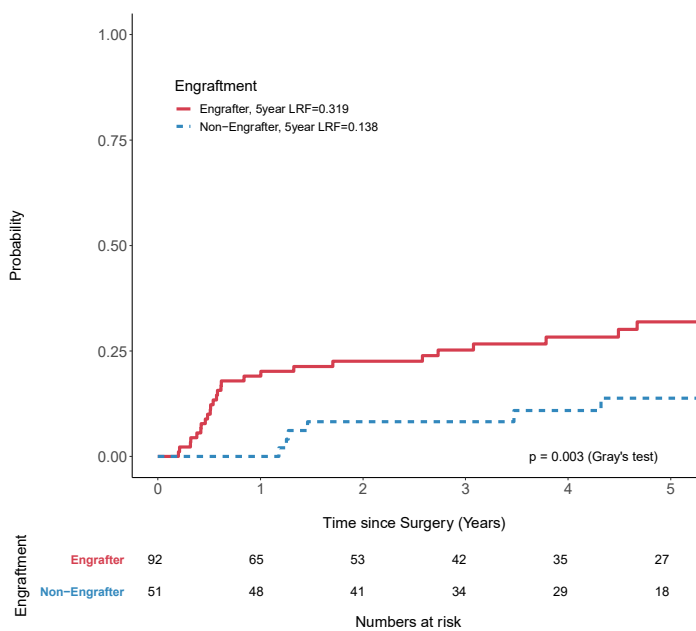

**3b) Distant Metastasis in Clinical High Risk Group**

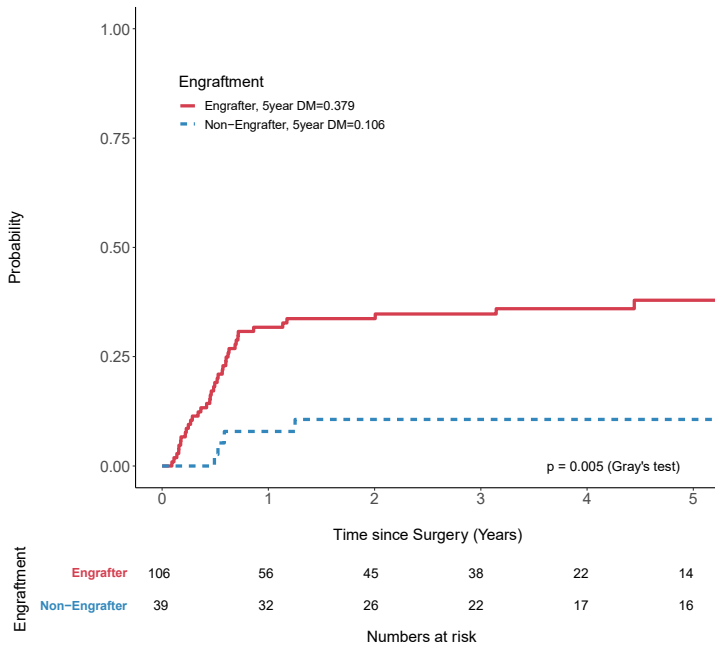

**eFigure 4.** Kaplan-Meier curve of overall survival in OSCC high- (n=111) vs low-risk groups (n=177)

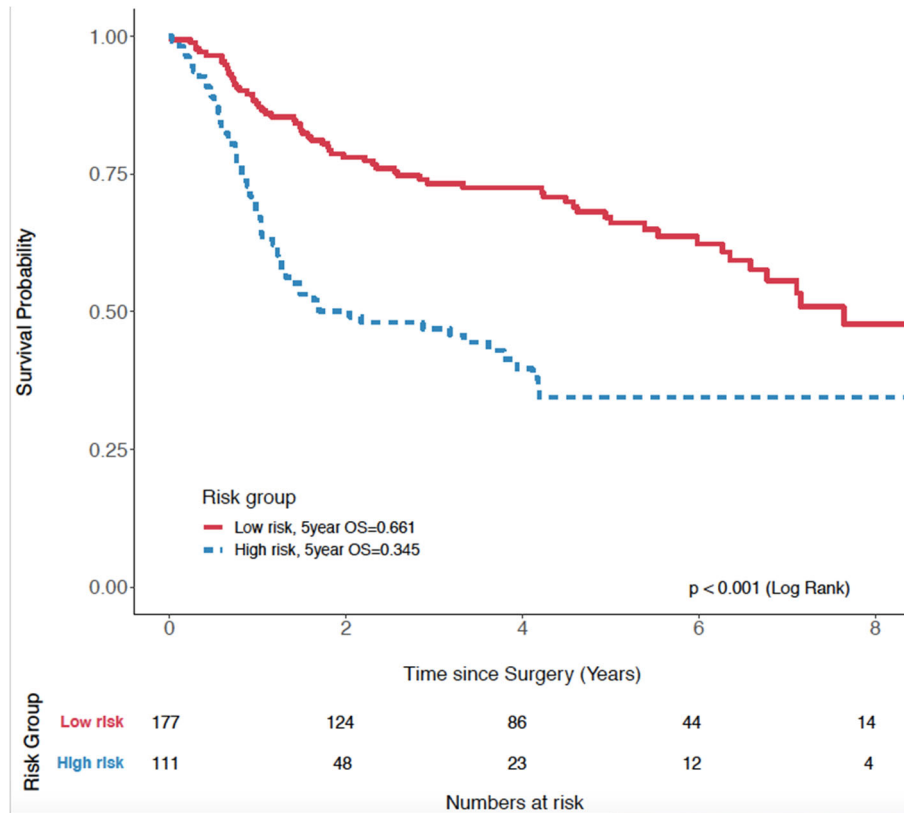

**eFigure 5.** Kaplan-Meier curve of overall survival in high- (5a) and low-risk (5b) clinical groups according to engraftment

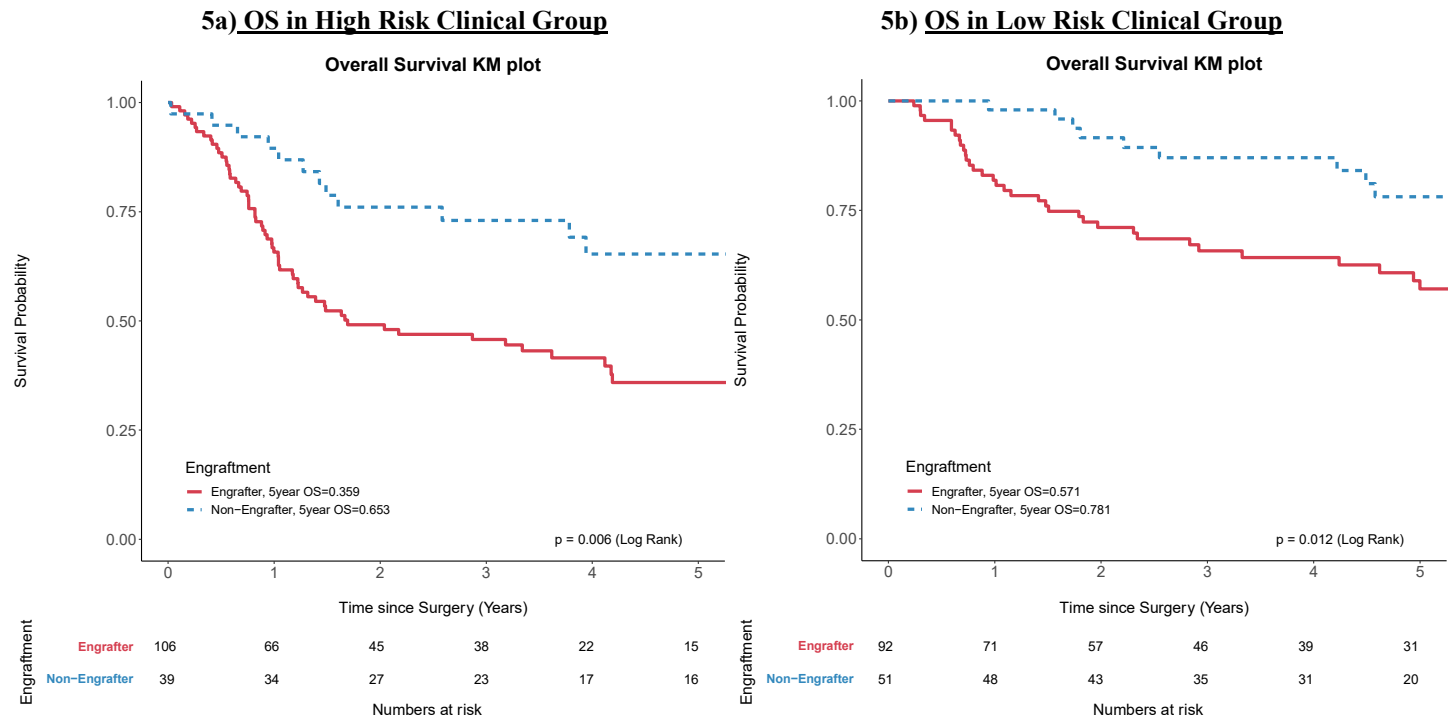

**eFigure 6.** Kaplan-Meier curve of overall survival in rapid (n=41) vs slow/non-engrafters (n=247)

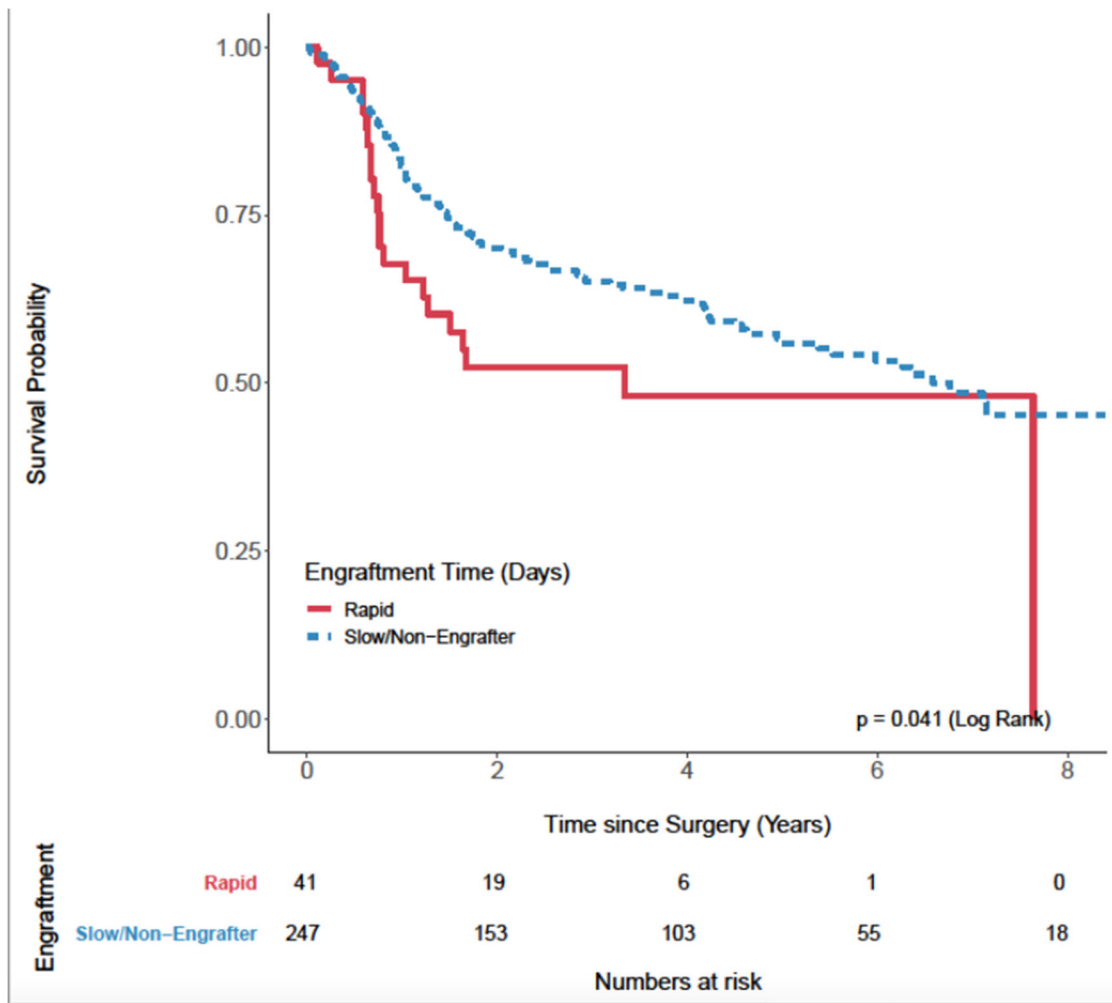



**eFigure 7.** Locoregional failure (7a), distant metastasis (7b) and overall survival (7c) in high- vs low- risk groups (PORT cohort)

**7a) Locoregional Failure in PORT subgroup**

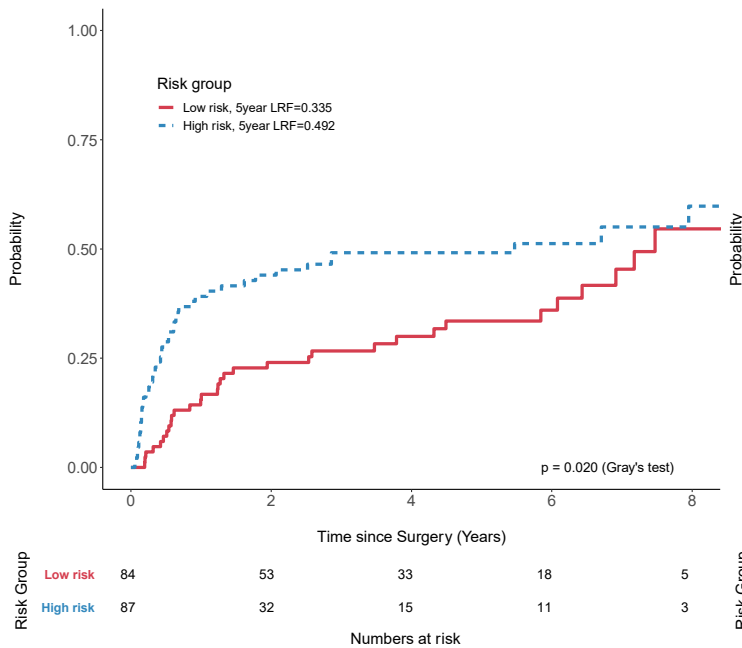

**7b) Distant Metastasis in PORT subgroup**

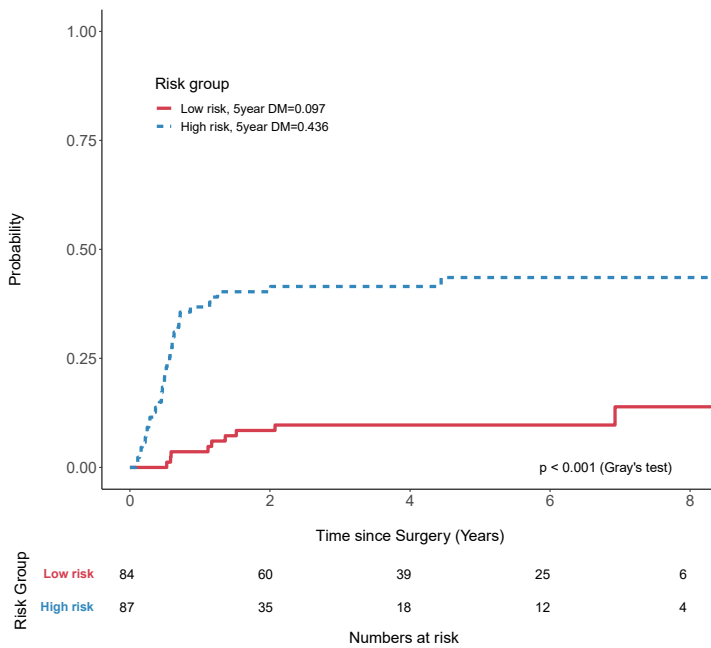

**7c) OS in PORT subgroup**

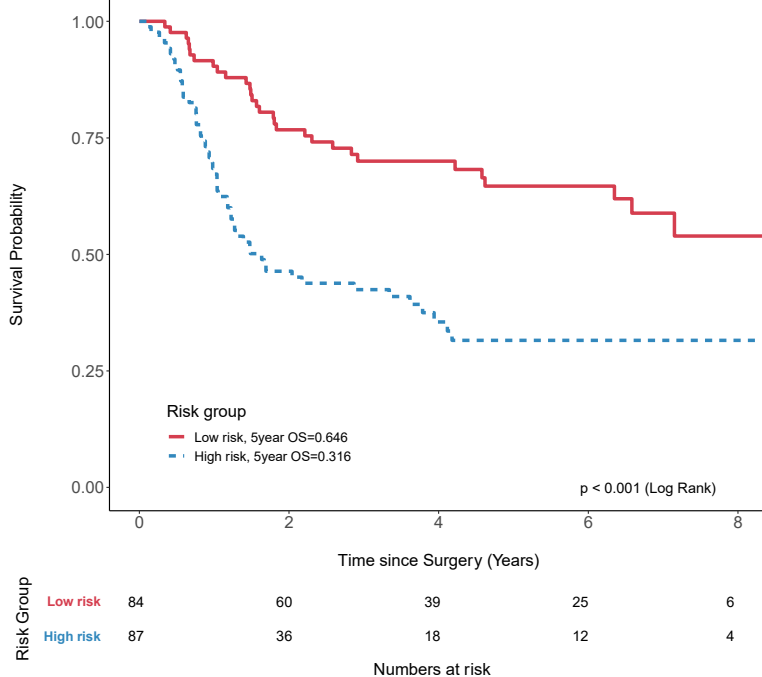

**eFigure 8.** Kaplan-Meier curve of LRF in engrafters and non-engrafting patients who did not receive PORT (T1-2 N0-1 with negative margins and no ENE)

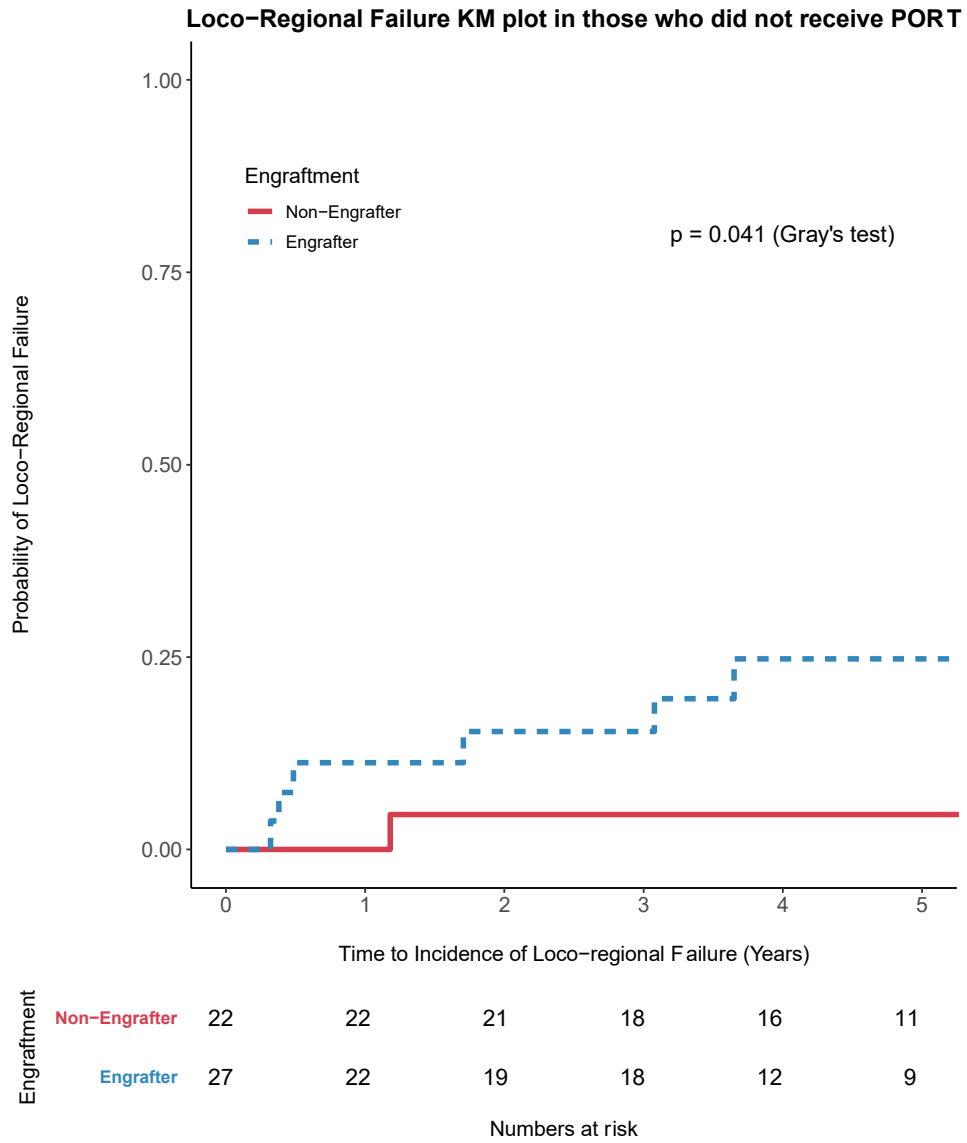

Supplement: jamaotolaryngolheadnecksurg-e220003-s001.pdf [file jamaotolaryngolheadnecksurg-e220003-s001.pdf]
